# Supplementary material for: Genetic liability to age at first sex and birth in relation to cardiovascular diseases: a Mendelian randomization study
Source: PubMed Central journal article supplement (PMC10080931; doi:10.1186/s12920-023-01496-w), 2023-04-06
Supplement: 12920_2023_1496_MOESM1_ESM.pdf [file 12920_2023_1496_MOESM1_ESM.pdf]

**Genetic liability to age at first sex and birth in relation to cardiovascular diseases: A Mendelian Randomization study**

**Supplementary material**

Table 1. Descriptive information of the studies and datasets included in the analyses.

| <b>GWAS</b>       | <b>Phenotype</b>                  | <b>Participants</b>                | <b>Ancestry</b> | <b>Use in this MR study</b> | <b>ID in IGD*</b> |
|-------------------|-----------------------------------|------------------------------------|-----------------|-----------------------------|-------------------|
| Mills MC, 2021    | Age at first sex                  | 182,791 males; 214,547 females     | European        | Exposure                    | NA.               |
| Mills MC, 2021    | Age at first birth                | 124,088 males; 418,758 females     | European        | Exposure                    | NA.               |
| Roselli C, 2018   | Atrial fibrillation               | 55,114 cases; 482,295 controls     | European        | Outcome                     | ebi-a-GCST006061  |
| Shah S, 2020      | Heart failure                     | 47,309 cases; 930,014 controls     | European        | Outcome                     | ebi-a-GCST009541  |
| CARDIoGRAMplusC4D | Coronary artery disease           | 60,801 cases; 123,504 controls     | Multi-ancestry  | Outcome                     | ieu-a-7           |
| CARDIoGRAMplusC4D | Myocardial infarction             | 43,676 cases; 128,199 controls     | Multi-ancestry  | Outcome                     | ieu-a-798         |
| Malik R, 2018     | Stroke                            | 40,585 cases; 406,111 controls     | European        | Outcome                     | ebi-a-GCST005838  |
| Malik R, 2018     | Any ischemic stroke               | 34,217 cases; 406,111 controls     | European        | Outcome                     | ebi-a-GCST005843  |
| Malik R, 2018     | Large-artery stroke               | 4,373 cases; 406,111 controls      | European        | Outcome                     | ebi-a-GCST005840  |
| Malik R, 2018     | Small-vessel stroke               | 5,386 cases; 192,662 controls      | European        | Outcome                     | ebi-a-GCST005841  |
| Malik R, 2018     | Cardioembolic stroke              | 7,193 cases; 406,111 controls      | European        | Outcome                     | ebi-a-GCST005842  |
| GSCAN             | Smoking initiation                | 1,232,091 individuals              | European        | Confounder                  | ieu-b-4877        |
| GSCAN             | Alcohol                           | 941,280 individuals                | European        | Confounder                  | ieu-b-73          |
| GIANT             | Body mass index                   | 322,154 individuals                | Multi-ancestry  | Confounder                  | ieu-a-2           |
| Howard DM, 2019   | Depression<br>(excluding 23andme) | 170,756 cases,<br>329,443 controls | European        | Confounder                  | ieu-b-102         |
| Lee JJ, 2018      | Education attainment              | 1,131,881 individuals              | European        | Confounder                  | NA.               |

\*IGD: The IEU GWAS database (<https://gwas.mrcieu.ac.uk/>)

Table 2. Associations of single nucleotide polymorphisms for age at first sex.

| SNP       | Chr | Position  | EA | NEA | EAF    | beta    | SE     | p-value  | N*     | F-statistic |
|-----------|-----|-----------|----|-----|--------|---------|--------|----------|--------|-------------|
| rs1962545 | 1   | 7522336   | T  | C   | 0.4799 | 0.0124  | 0.0021 | 4.20E-10 | 387338 | 34.9        |
| rs803679  | 1   | 44349405  | G  | A   | 0.2055 | -0.0175 | 0.0025 | 6.80E-12 | 387338 | 49.0        |
| rs7533341 | 1   | 58255002  | G  | C   | 0.3878 | -0.0119 | 0.0021 | 1.30E-08 | 387338 | 32.1        |
| rs1392816 | 1   | 66481188  | C  | T   | 0.6125 | -0.017  | 0.0021 | 6.20E-16 | 387338 | 65.5        |
| rs1119919 | 1   | 72887402  | C  | A   | 0.9269 | -0.0246 | 0.0041 | 2.30E-09 | 387338 | 36.0        |
| rs7721450 | 1   | 75316394  | A  | T   | 0.9519 | -0.0315 | 0.0048 | 3.10E-11 | 387338 | 43.1        |
| rs3451743 | 1   | 78450517  | C  | A   | 0.8728 | 0.0196  | 0.0032 | 6.50E-10 | 387338 | 37.5        |
| rs1416550 | 1   | 87794596  | C  | T   | 0.9612 | 0.0301  | 0.0054 | 2.70E-08 | 387338 | 31.1        |
| rs1156981 | 1   | 88829969  | A  | G   | 0.0985 | 0.0207  | 0.0035 | 1.60E-09 | 387338 | 35.0        |
| rs1931262 | 1   | 96174912  | T  | C   | 0.5092 | 0.0118  | 0.0021 | 1.00E-08 | 387338 | 31.6        |
| rs1146566 | 1   | 97122384  | A  | G   | 0.2273 | 0.0133  | 0.0025 | 6.90E-08 | 387338 | 28.3        |
| rs2274568 | 1   | 110612925 | G  | A   | 0.4198 | 0.0129  | 0.0021 | 4.60E-10 | 387338 | 37.7        |
| rs7976448 | 1   | 115330070 | G  | A   | 0.6672 | -0.0127 | 0.0022 | 1.10E-08 | 387338 | 33.3        |
| rs1120477 | 1   | 151054180 | G  | A   | 0.2197 | -0.0151 | 0.0025 | 1.90E-09 | 387338 | 36.5        |
| rs4612664 | 1   | 153822673 | T  | C   | 0.6776 | 0.0141  | 0.0022 | 2.60E-10 | 387338 | 41.1        |
| rs1476337 | 1   | 156320524 | C  | T   | 0.9339 | 0.0242  | 0.0042 | 8.10E-09 | 387338 | 33.2        |
| rs1997699 | 1   | 198219387 | G  | C   | 0.8429 | 0.0173  | 0.003  | 3.80E-09 | 387338 | 33.3        |
| rs1124033 | 1   | 204968339 | C  | T   | 0.7383 | -0.014  | 0.0024 | 2.20E-09 | 387338 | 34.0        |
| rs1015716 | 1   | 214484950 | C  | T   | 0.5835 | 0.0119  | 0.0021 | 1.20E-08 | 387338 | 32.1        |
| rs2275307 | 1   | 232574921 | T  | C   | 0.7518 | -0.0134 | 0.0024 | 2.10E-08 | 387338 | 31.2        |
| rs6586405 | 1   | 234739101 | C  | A   | 0.6720 | 0.0122  | 0.0022 | 3.00E-08 | 387338 | 30.8        |
| rs1320330 | 2   | 622225    | T  | G   | 0.1717 | 0.0178  | 0.0027 | 1.10E-10 | 387338 | 43.5        |
| rs2091377 | 2   | 6145158   | C  | T   | 0.6269 | -0.0118 | 0.0021 | 3.10E-08 | 387338 | 31.6        |
| rs2014149 | 2   | 14539477  | T  | C   | 0.4746 | 0.012   | 0.0021 | 1.20E-08 | 387338 | 32.7        |
| rs6744657 | 2   | 22554648  | A  | G   | 0.6310 | 0.0144  | 0.0021 | 1.30E-11 | 387338 | 47.0        |
| rs1246372 | 2   | 26948413  | G  | A   | 0.4734 | -0.0141 | 0.0021 | 5.90E-12 | 387338 | 45.1        |
| rs4952343 | 2   | 32858637  | A  | G   | 0.5528 | -0.0126 | 0.0021 | 2.20E-09 | 387338 | 36.0        |
| rs5625488 | 2   | 44842184  | T  | A   | 0.3803 | 0.0191  | 0.0021 | 1.40E-19 | 387338 | 82.7        |
| rs985919  | 2   | 50687013  | C  | A   | 0.7107 | 0.0143  | 0.0023 | 2.20E-10 | 387338 | 38.7        |
| rs1516172 | 2   | 51853955  | C  | G   | 0.7987 | -0.0155 | 0.0026 | 1.70E-09 | 387338 | 35.5        |
| rs9789483 | 2   | 58492345  | A  | G   | 0.6346 | 0.0131  | 0.0021 | 2.20E-09 | 387338 | 38.9        |
| rs6719762 | 2   | 60166832  | T  | C   | 0.5257 | 0.0221  | 0.0021 | 7.20E-27 | 387338 | 110.7       |
| rs359243  | 2   | 60475509  | T  | C   | 0.3925 | 0.0213  | 0.0021 | 1.10E-23 | 387338 | 102.9       |
| rs1232834 | 2   | 60785937  | A  | G   | 0.5581 | -0.0135 | 0.0021 | 2.00E-10 | 387338 | 41.3        |
| rs6218026 | 2   | 63320524  | T  | C   | 0.7809 | -0.0196 | 0.0025 | 1.40E-15 | 387338 | 61.5        |
| rs1168802 | 2   | 78018164  | A  | G   | 0.9266 | -0.0224 | 0.004  | 1.40E-08 | 387338 | 31.4        |
| rs1368546 | 2   | 104057364 | T  | C   | 0.4433 | -0.0165 | 0.0021 | 2.50E-15 | 387338 | 61.7        |
| rs4583397 | 2   | 140328261 | T  | C   | 0.3692 | -0.0161 | 0.0022 | 3.50E-13 | 387338 | 53.6        |
| rs1269259 | 2   | 161265910 | C  | T   | 0.6276 | 0.0119  | 0.0021 | 2.40E-08 | 387338 | 32.1        |
| rs1167898 | 2   | 162101261 | G  | A   | 0.5373 | 0.012   | 0.0021 | 1.20E-08 | 387338 | 32.7        |

|           |   |           |   |   |        |         |        |          |        |       |
|-----------|---|-----------|---|---|--------|---------|--------|----------|--------|-------|
| rs1016588 | 2 | 164879903 | C | A | 0.7798 | -0.0138 | 0.0025 | 7.90E-09 | 387338 | 30.5  |
| rs1338797 | 2 | 166193965 | C | A | 0.5275 | 0.0119  | 0.0021 | 9.80E-09 | 387338 | 32.1  |
| rs1300932 | 2 | 171624415 | A | T | 0.6696 | 0.0118  | 0.0022 | 4.00E-08 | 387338 | 28.8  |
| rs7575189 | 2 | 174015168 | G | A | 0.4107 | -0.0164 | 0.0021 | 1.90E-15 | 387338 | 61.0  |
| rs5630605 | 2 | 184416610 | G | A | 0.7853 | -0.0157 | 0.0025 | 4.10E-10 | 387338 | 39.4  |
| rs1477251 | 2 | 185529344 | C | T | 0.9610 | 0.0307  | 0.0054 | 5.70E-09 | 387338 | 32.3  |
| rs1300648 | 2 | 212691559 | A | C | 0.5173 | -0.0131 | 0.0021 | 6.90E-10 | 387338 | 38.9  |
| rs875097  | 2 | 220353104 | A | G | 0.2988 | 0.0125  | 0.0023 | 3.40E-08 | 387338 | 29.5  |
| rs6748341 | 2 | 225377574 | C | G | 0.6847 | -0.0149 | 0.0022 | 1.10E-11 | 387338 | 45.9  |
| rs9809849 | 3 | 3726156   | G | A | 0.5747 | 0.014   | 0.0021 | 1.80E-11 | 387338 | 44.4  |
| rs2084572 | 3 | 17315758  | A | G | 0.5492 | -0.014  | 0.0021 | 3.50E-11 | 387338 | 44.4  |
| rs6550942 | 3 | 19115331  | C | T | 0.7846 | -0.0137 | 0.0025 | 3.00E-08 | 387338 | 30.0  |
| rs1144563 | 3 | 24673158  | C | A | 0.9803 | -0.0441 | 0.0075 | 1.00E-08 | 387338 | 34.6  |
| rs2362774 | 3 | 24920083  | A | G | 0.3918 | 0.0124  | 0.0021 | 1.80E-08 | 387338 | 34.9  |
| rs2278480 | 3 | 25635743  | T | C | 0.7124 | -0.0125 | 0.0023 | 2.70E-08 | 387338 | 29.5  |
| rs6772342 | 3 | 35775115  | T | A | 0.6243 | -0.0146 | 0.0021 | 1.30E-11 | 387338 | 48.3  |
| rs1115990 | 3 | 49502779  | A | G | 0.1144 | 0.0316  | 0.0034 | 6.60E-21 | 387338 | 86.4  |
| rs2188151 | 3 | 50201924  | G | T | 0.5745 | 0.021   | 0.0021 | 2.10E-24 | 387338 | 100.0 |
| rs2612029 | 3 | 53773492  | T | C | 0.1621 | -0.0239 | 0.0028 | 1.20E-17 | 387338 | 72.9  |
| rs1867234 | 3 | 54156598  | A | G | 0.8483 | 0.0183  | 0.0029 | 5.10E-11 | 387338 | 39.8  |
| rs6764919 | 3 | 60879538  | G | A | 0.7367 | 0.0135  | 0.0023 | 2.30E-09 | 387338 | 34.5  |
| rs6445264 | 3 | 62354425  | G | A | 0.3307 | 0.0126  | 0.0023 | 4.50E-08 | 387338 | 30.0  |
| rs7618715 | 3 | 70873278  | G | A | 0.5808 | -0.0126 | 0.0021 | 1.90E-09 | 387338 | 36.0  |
| rs4334682 | 3 | 74949456  | T | C | 0.1559 | 0.0185  | 0.0029 | 1.20E-10 | 387338 | 40.7  |
| rs1271459 | 3 | 84387950  | A | C | 0.7252 | 0.0217  | 0.0023 | 1.10E-20 | 387338 | 89.0  |
| rs1125235 | 3 | 85650341  | T | C | 0.3717 | -0.024  | 0.0022 | 1.20E-28 | 387338 | 119.0 |
| rs6797231 | 3 | 86671515  | G | C | 0.6880 | 0.0163  | 0.0022 | 2.10E-13 | 387338 | 54.9  |
| rs1271470 | 3 | 88249922  | A | G | 0.1590 | 0.0242  | 0.0028 | 1.40E-17 | 387338 | 74.7  |
| rs9819555 | 3 | 94006243  | G | A | 0.4349 | -0.0123 | 0.0021 | 1.60E-09 | 387338 | 34.3  |
| rs1377276 | 3 | 107948019 | C | G | 0.4165 | 0.0183  | 0.0021 | 3.00E-18 | 387338 | 75.9  |
| rs1769913 | 3 | 115885360 | G | A | 0.7582 | 0.0131  | 0.0025 | 4.60E-08 | 387338 | 27.5  |
| rs5794512 | 3 | 117641724 | C | T | 0.8511 | -0.0229 | 0.0029 | 6.40E-15 | 387338 | 62.4  |
| rs705240  | 3 | 118457615 | C | T | 0.8150 | 0.015   | 0.0027 | 7.00E-09 | 387338 | 30.9  |
| rs5639224 | 3 | 131968209 | A | C | 0.6068 | 0.014   | 0.0021 | 8.90E-12 | 387338 | 44.4  |
| rs1685945 | 3 | 147161075 | A | G | 0.6146 | -0.0138 | 0.0023 | 1.90E-09 | 387338 | 36.0  |
| rs7785711 | 4 | 19299307  | C | G | 0.6693 | 0.0148  | 0.0022 | 9.70E-12 | 387338 | 45.3  |
| rs3481147 | 4 | 25408838  | G | A | 0.7683 | -0.0155 | 0.0024 | 1.30E-10 | 387338 | 41.7  |
| rs702     | 4 | 28710551  | A | T | 0.1622 | -0.0181 | 0.0028 | 2.80E-10 | 387338 | 41.8  |
| rs7263106 | 4 | 60247508  | C | T | 0.9698 | -0.035  | 0.006  | 4.40E-09 | 387338 | 34.0  |
| rs7671317 | 4 | 62972597  | G | T | 0.3185 | -0.0122 | 0.0022 | 3.50E-08 | 387338 | 30.8  |
| rs993700  | 4 | 67825894  | T | C | 0.2225 | -0.0157 | 0.0025 | 2.90E-10 | 387338 | 39.4  |
| rs1051687 | 4 | 91590266  | T | G | 0.7653 | 0.0148  | 0.0024 | 6.60E-10 | 387338 | 38.0  |

|           |   |           |   |   |        |         |        |          |        |       |
|-----------|---|-----------|---|---|--------|---------|--------|----------|--------|-------|
| rs1172908 | 4 | 112503872 | G | A | 0.8278 | -0.0222 | 0.0027 | 4.10E-16 | 387338 | 67.6  |
| rs809955  | 4 | 140874760 | G | A | 0.6340 | -0.0157 | 0.0021 | 1.00E-13 | 387338 | 55.9  |
| rs435538  | 5 | 24921398  | C | G | 0.7691 | 0.017   | 0.0024 | 2.50E-12 | 387338 | 50.2  |
| rs3435706 | 5 | 30041736  | G | T | 0.6337 | 0.0122  | 0.0022 | 3.10E-08 | 387338 | 30.8  |
| rs1251743 | 5 | 30842054  | T | G | 0.4577 | 0.0123  | 0.0021 | 3.30E-09 | 387338 | 34.3  |
| rs1252339 | 5 | 45119647  | T | A | 0.8275 | -0.0219 | 0.0027 | 1.10E-15 | 387338 | 65.8  |
| rs4865723 | 5 | 49440206  | T | C | 0.2652 | -0.0146 | 0.0026 | 4.40E-09 | 387338 | 31.5  |
| rs6449608 | 5 | 50696922  | T | A | 0.6171 | -0.0123 | 0.0021 | 6.80E-09 | 387338 | 34.3  |
| rs7381195 | 5 | 60030791  | T | A | 0.3886 | 0.0136  | 0.0021 | 1.60E-10 | 387338 | 41.9  |
| rs1005540 | 5 | 77628709  | A | G | 0.6614 | 0.0124  | 0.0022 | 3.30E-08 | 387338 | 31.8  |
| rs5777228 | 5 | 104757151 | T | C | 0.6013 | -0.0126 | 0.0021 | 2.00E-09 | 387338 | 36.0  |
| rs2406374 | 5 | 106936435 | C | T | 0.6856 | -0.0139 | 0.0022 | 4.30E-10 | 387338 | 39.9  |
| rs1195925 | 5 | 112018894 | A | G | 0.8203 | -0.0148 | 0.0027 | 4.80E-08 | 387338 | 30.0  |
| rs1005836 | 5 | 124235427 | A | G | 0.8221 | -0.0179 | 0.0028 | 1.90E-10 | 387338 | 40.9  |
| rs2910032 | 5 | 152540354 | C | T | 0.4821 | -0.0128 | 0.0021 | 3.00E-10 | 387338 | 37.2  |
| rs1298310 | 5 | 154900639 | G | T | 0.6863 | 0.0163  | 0.0022 | 3.00E-13 | 387338 | 54.9  |
| rs292423  | 5 | 163053445 | G | A | 0.5545 | 0.0122  | 0.0021 | 7.30E-09 | 387338 | 33.8  |
| rs4868800 | 5 | 166985224 | G | T | 0.4183 | -0.0128 | 0.0021 | 8.20E-10 | 387338 | 37.2  |
| rs1195543 | 5 | 167420296 | T | G | 0.6955 | 0.0137  | 0.0023 | 1.40E-09 | 387338 | 35.5  |
| rs245753  | 5 | 170486143 | T | C | 0.3182 | 0.0133  | 0.0022 | 1.60E-09 | 387338 | 36.5  |
| rs1220359 | 6 | 396321    | C | T | 0.7803 | -0.014  | 0.0026 | 3.60E-08 | 387338 | 29.0  |
| rs2744042 | 6 | 19183178  | A | G | 0.2271 | -0.0149 | 0.0025 | 2.20E-09 | 387338 | 35.5  |
| rs767943  | 6 | 23446691  | C | A | 0.7375 | 0.0171  | 0.0024 | 5.70E-13 | 387338 | 50.8  |
| rs766406  | 6 | 26319588  | G | T | 0.3908 | -0.0136 | 0.0021 | 2.30E-10 | 387338 | 41.9  |
| rs7746553 | 6 | 31895973  | C | G | 0.8485 | 0.0161  | 0.0029 | 4.90E-08 | 387338 | 30.8  |
| rs1415477 | 6 | 50615935  | G | A | 0.9179 | -0.0324 | 0.0038 | 1.40E-17 | 387338 | 72.7  |
| rs222440  | 6 | 52946320  | T | C | 0.1802 | -0.017  | 0.0027 | 4.90E-10 | 387338 | 39.6  |
| rs2653349 | 6 | 55142337  | G | A | 0.7663 | 0.0139  | 0.0025 | 3.40E-08 | 387338 | 30.9  |
| rs1925686 | 6 | 87858691  | G | A | 0.6107 | -0.0123 | 0.0021 | 7.30E-09 | 387338 | 34.3  |
| rs2397678 | 6 | 100345238 | A | G | 0.3064 | 0.0154  | 0.0022 | 1.70E-11 | 387338 | 49.0  |
| rs7739574 | 6 | 101380707 | C | T | 0.2667 | -0.0137 | 0.0024 | 6.70E-09 | 387338 | 32.6  |
| rs7299085 | 6 | 105147784 | G | A | 0.9038 | -0.0215 | 0.0035 | 8.50E-10 | 387338 | 37.7  |
| rs7452074 | 6 | 125050993 | A | C | 0.4739 | 0.0129  | 0.0021 | 4.50E-10 | 387338 | 37.7  |
| rs1321687 | 6 | 145257393 | A | G | 0.8838 | 0.0175  | 0.0032 | 4.40E-08 | 387338 | 29.9  |
| rs1220471 | 6 | 152235339 | C | T | 0.3687 | -0.0275 | 0.0021 | 8.30E-38 | 387338 | 171.5 |
| rs205983  | 6 | 164422743 | C | G | 0.3646 | 0.0138  | 0.0022 | 4.10E-10 | 387338 | 39.3  |
| rs6951209 | 7 | 1273821   | T | A | 0.2246 | 0.0201  | 0.0025 | 2.60E-15 | 387338 | 64.6  |
| rs4552798 | 7 | 1928001   | C | T | 0.4622 | -0.0164 | 0.0021 | 7.40E-15 | 387338 | 61.0  |
| rs7785195 | 7 | 3424686   | G | A | 0.3409 | -0.0142 | 0.0022 | 9.50E-11 | 387338 | 41.7  |
| rs198310  | 7 | 24191861  | A | T | 0.7862 | -0.0168 | 0.0025 | 3.00E-11 | 387338 | 45.2  |
| rs3585155 | 7 | 31330785  | A | G | 0.8983 | 0.0247  | 0.0034 | 2.50E-13 | 387338 | 52.8  |
| rs1023347 | 7 | 32265007  | C | T | 0.7482 | 0.0142  | 0.0024 | 4.20E-09 | 387338 | 35.0  |

|           |    |           |   |   |        |         |        |          |        |      |
|-----------|----|-----------|---|---|--------|---------|--------|----------|--------|------|
| rs1270126 | 7  | 32962089  | C | T | 0.6001 | -0.0126 | 0.0021 | 5.90E-09 | 387338 | 36.0 |
| rs794375  | 7  | 75147801  | T | C | 0.5728 | -0.0142 | 0.0021 | 1.40E-11 | 387338 | 45.7 |
| rs6962772 | 7  | 99081730  | A | G | 0.8459 | -0.0228 | 0.0029 | 2.10E-15 | 387338 | 61.8 |
| rs1330722 | 7  | 105084671 | G | A | 0.1070 | -0.0218 | 0.0034 | 4.70E-11 | 387338 | 41.1 |
| rs2694934 | 7  | 113973708 | A | G | 0.2487 | -0.0175 | 0.0024 | 9.20E-13 | 387338 | 53.2 |
| rs7783012 | 7  | 114116881 | G | A | 0.4072 | 0.0196  | 0.0021 | 1.40E-20 | 387338 | 87.1 |
| rs1177016 | 7  | 116417848 | G | C | 0.6685 | 0.0139  | 0.0022 | 3.50E-10 | 387338 | 39.9 |
| rs4730883 | 7  | 118299289 | C | A | 0.4908 | -0.0113 | 0.0021 | 4.50E-08 | 387338 | 29.0 |
| rs1176728 | 7  | 121947456 | A | G | 0.7788 | 0.0191  | 0.0025 | 2.80E-14 | 387338 | 58.4 |
| rs1177244 | 7  | 133453874 | G | A | 0.8112 | 0.0203  | 0.0027 | 2.10E-14 | 387338 | 56.5 |
| rs6966898 | 7  | 135221170 | C | T | 0.6681 | 0.0132  | 0.0022 | 1.60E-09 | 387338 | 36.0 |
| rs1133672 | 7  | 140144414 | C | T | 0.7207 | -0.0172 | 0.0023 | 1.90E-13 | 387338 | 55.9 |
| rs1991651 | 8  | 10706411  | C | G | 0.3824 | -0.0182 | 0.0021 | 1.70E-17 | 387338 | 75.1 |
| rs7008955 | 8  | 26334103  | T | G | 0.4727 | -0.0116 | 0.0021 | 3.40E-08 | 387338 | 30.5 |
| rs7828172 | 8  | 38340137  | A | G | 0.4000 | -0.0119 | 0.0021 | 1.40E-08 | 387338 | 32.1 |
| rs7824756 | 8  | 51118559  | T | C | 0.7062 | 0.0155  | 0.0023 | 2.80E-11 | 387338 | 45.4 |
| rs4537316 | 8  | 53131574  | T | C | 0.8229 | 0.0142  | 0.0027 | 4.60E-08 | 387338 | 27.7 |
| rs1585634 | 8  | 54396376  | G | C | 0.1988 | 0.0146  | 0.0026 | 1.30E-08 | 387338 | 31.5 |
| rs1010452 | 8  | 73889570  | T | C | 0.4777 | 0.0123  | 0.0021 | 6.70E-10 | 387338 | 34.3 |
| rs6997641 | 8  | 86676101  | C | T | 0.1739 | -0.0182 | 0.0027 | 1.50E-11 | 387338 | 45.4 |
| rs3591843 | 8  | 91894514  | T | C | 0.7430 | 0.0137  | 0.0024 | 1.30E-08 | 387338 | 32.6 |
| rs3724201 | 8  | 93394601  | C | T | 0.9786 | -0.0405 | 0.0072 | 3.10E-08 | 387338 | 31.6 |
| rs7267482 | 8  | 95489281  | T | C | 0.7587 | -0.0137 | 0.0024 | 3.40E-08 | 387338 | 32.6 |
| rs1095508 | 8  | 97825208  | C | T | 0.4213 | 0.0131  | 0.0021 | 2.50E-10 | 387338 | 38.9 |
| rs9643087 | 8  | 115382484 | C | T | 0.4750 | 0.0135  | 0.0021 | 9.40E-11 | 387338 | 41.3 |
| rs1328059 | 8  | 116686752 | C | G | 0.2731 | 0.0134  | 0.0023 | 9.30E-09 | 387338 | 33.9 |
| rs8180995 | 8  | 143326237 | A | G | 0.5350 | -0.0122 | 0.0021 | 8.90E-10 | 387338 | 33.8 |
| rs7033296 | 9  | 8932704   | A | T | 0.2002 | 0.0149  | 0.0026 | 1.60E-08 | 387338 | 32.8 |
| rs4961705 | 9  | 16347927  | G | C | 0.6528 | -0.013  | 0.0022 | 4.20E-09 | 387338 | 34.9 |
| rs1255451 | 9  | 23352293  | T | C | 0.5834 | -0.0126 | 0.0021 | 1.20E-09 | 387338 | 36.0 |
| rs1074657 | 9  | 81512820  | A | G | 0.6604 | -0.0129 | 0.0022 | 5.40E-09 | 387338 | 34.4 |
| rs3501078 | 9  | 86499923  | G | A | 0.8735 | -0.0194 | 0.0032 | 1.70E-09 | 387338 | 36.8 |
| rs1099281 | 9  | 96392182  | G | A | 0.6288 | -0.0121 | 0.0022 | 1.70E-08 | 387338 | 30.2 |
| rs2090409 | 9  | 108967088 | C | A | 0.6523 | 0.0153  | 0.0022 | 2.60E-12 | 387338 | 48.4 |
| rs9886840 | 9  | 124602728 | A | G | 0.4203 | -0.0115 | 0.0021 | 4.40E-08 | 387338 | 30.0 |
| rs4292819 | 9  | 134929122 | T | C | 0.3188 | -0.0147 | 0.0022 | 2.10E-11 | 387338 | 44.6 |
| rs7358158 | 9  | 140251458 | G | A | 0.8762 | 0.0171  | 0.0031 | 1.70E-08 | 387338 | 30.4 |
| rs1125590 | 10 | 8798182   | A | C | 0.7444 | 0.0135  | 0.0024 | 1.20E-08 | 387338 | 31.6 |
| rs1159917 | 10 | 9982177   | C | A | 0.6160 | -0.0126 | 0.0021 | 2.80E-09 | 387338 | 36.0 |
| rs2093623 | 10 | 10922977  | G | A | 0.5030 | -0.0139 | 0.0021 | 4.50E-11 | 387338 | 43.8 |
| rs2650705 | 10 | 63239803  | A | G | 0.1621 | 0.0166  | 0.0028 | 3.70E-09 | 387338 | 35.1 |
| rs6185697 | 10 | 97941022  | T | C | 0.6600 | 0.0154  | 0.0022 | 5.70E-13 | 387338 | 49.0 |

|           |    |           |   |   |        |         |        |          |        |      |
|-----------|----|-----------|---|---|--------|---------|--------|----------|--------|------|
| rs1224438 | 10 | 104640052 | G | A | 0.6626 | 0.0136  | 0.0022 | 5.80E-10 | 387338 | 38.2 |
| rs3896224 | 10 | 106467853 | A | G | 0.5877 | -0.0198 | 0.0021 | 2.70E-21 | 387338 | 88.9 |
| rs1074923 | 10 | 118777998 | G | C | 0.2363 | -0.0179 | 0.0025 | 4.90E-13 | 387338 | 51.3 |
| rs6186445 | 10 | 120001867 | A | G | 0.8178 | -0.0147 | 0.0027 | 2.50E-08 | 387338 | 29.6 |
| rs7897631 | 10 | 127176961 | A | G | 0.4560 | -0.0133 | 0.0021 | 1.70E-10 | 387338 | 40.1 |
| rs7079070 | 10 | 134182921 | G | A | 0.5463 | 0.0165  | 0.0021 | 1.20E-15 | 387338 | 61.7 |
| rs1866710 | 11 | 12875312  | A | G | 0.2919 | -0.0148 | 0.0023 | 2.30E-10 | 387338 | 41.4 |
| rs1083538 | 11 | 28671629  | G | C | 0.6554 | -0.0161 | 0.0022 | 6.60E-14 | 387338 | 53.6 |
| rs3480422 | 11 | 43771084  | A | G | 0.5936 | -0.0151 | 0.0021 | 1.90E-13 | 387338 | 51.7 |
| rs6188275 | 11 | 46611805  | A | G | 0.7382 | 0.0166  | 0.0026 | 2.20E-10 | 387338 | 40.8 |
| rs1104036 | 11 | 49450176  | G | A | 0.1486 | -0.0192 | 0.0031 | 5.30E-10 | 387338 | 38.4 |
| rs4439537 | 11 | 79887549  | T | C | 0.4763 | -0.0132 | 0.0021 | 1.10E-10 | 387338 | 39.5 |
| rs7943198 | 11 | 112882179 | T | G | 0.6255 | 0.0159  | 0.0022 | 1.70E-13 | 387338 | 52.2 |
| rs7927195 | 11 | 127478073 | A | G | 0.3847 | 0.0155  | 0.0021 | 1.90E-13 | 387338 | 54.5 |
| rs543528  | 11 | 134099101 | T | G | 0.2764 | -0.0125 | 0.0023 | 4.20E-08 | 387338 | 29.5 |
| rs1074329 | 12 | 19149370  | G | C | 0.3743 | -0.013  | 0.0021 | 6.50E-10 | 387338 | 38.3 |
| rs1077045 | 12 | 19381384  | T | C | 0.1781 | 0.0149  | 0.0027 | 2.10E-08 | 387338 | 30.5 |
| rs1104722 | 12 | 24195587  | C | T | 0.5609 | 0.0133  | 0.0021 | 1.80E-10 | 387338 | 40.1 |
| rs1472874 | 12 | 24575272  | T | C | 0.8063 | -0.0161 | 0.0028 | 1.30E-08 | 387338 | 33.1 |
| rs285582  | 12 | 41948845  | C | T | 0.1788 | 0.0182  | 0.0028 | 2.80E-11 | 387338 | 42.2 |
| rs5728106 | 12 | 54660427  | G | A | 0.5891 | -0.0117 | 0.0021 | 1.30E-08 | 387338 | 31.0 |
| rs7955865 | 12 | 56468706  | A | T | 0.3515 | 0.0134  | 0.0022 | 8.40E-10 | 387338 | 37.1 |
| rs7972441 | 12 | 84043146  | C | A | 0.3575 | 0.0149  | 0.0022 | 1.10E-11 | 387338 | 45.9 |
| rs2279574 | 12 | 89745477  | C | A | 0.4575 | -0.0119 | 0.0021 | 2.60E-08 | 387338 | 32.1 |
| rs7578337 | 13 | 27535824  | T | C | 0.8594 | -0.0203 | 0.003  | 1.10E-10 | 387338 | 45.8 |
| rs9554165 | 13 | 28393340  | G | A | 0.6306 | 0.0127  | 0.0022 | 5.30E-09 | 387338 | 33.3 |
| rs9536961 | 13 | 55678332  | A | G | 0.5569 | -0.0135 | 0.0022 | 1.90E-10 | 387338 | 37.7 |
| rs6196082 | 13 | 57267105  | G | A | 0.9408 | 0.0255  | 0.0044 | 3.80E-09 | 387338 | 33.6 |
| rs9538248 | 13 | 59492828  | C | A | 0.6783 | 0.0159  | 0.0022 | 3.00E-13 | 387338 | 52.2 |
| rs341521  | 13 | 60399045  | G | A | 0.2978 | 0.0159  | 0.0023 | 9.00E-13 | 387338 | 47.8 |
| rs2174752 | 13 | 69332015  | G | T | 0.5474 | 0.0128  | 0.0021 | 5.90E-10 | 387338 | 37.2 |
| rs4144635 | 13 | 107653719 | G | A | 0.5030 | -0.0115 | 0.0021 | 2.40E-08 | 387338 | 30.0 |
| rs1289402 | 14 | 27611872  | T | G | 0.7145 | 0.0122  | 0.0023 | 3.80E-08 | 387338 | 28.1 |
| rs1398814 | 14 | 30727612  | A | T | 0.9757 | -0.0408 | 0.0068 | 1.20E-09 | 387338 | 36.0 |
| rs1752212 | 14 | 33302882  | T | G | 0.6110 | -0.0131 | 0.0023 | 1.80E-08 | 387338 | 32.4 |
| rs1214746 | 14 | 41059928  | G | A | 0.8073 | 0.0202  | 0.0026 | 3.60E-14 | 387338 | 60.4 |
| rs3007104 | 14 | 47367434  | G | A | 0.5767 | 0.0148  | 0.0021 | 1.50E-12 | 387338 | 49.7 |
| rs1287835 | 14 | 58816212  | A | C | 0.4656 | -0.0134 | 0.0021 | 5.30E-10 | 387338 | 40.7 |
| rs1013765 | 14 | 85624262  | G | T | 0.6345 | -0.0121 | 0.0022 | 1.60E-08 | 387338 | 30.2 |
| rs1013469 | 14 | 93912668  | C | A | 0.4419 | 0.0143  | 0.0021 | 2.10E-11 | 387338 | 46.4 |
| rs2892947 | 14 | 94844947  | C | T | 0.9799 | -0.0416 | 0.0074 | 1.20E-08 | 387338 | 31.6 |
| rs7671506 | 14 | 98597420  | G | C | 0.7919 | 0.0196  | 0.0026 | 1.90E-14 | 387338 | 56.8 |

|           |    |           |   |   |        |         |        |          |        |       |
|-----------|----|-----------|---|---|--------|---------|--------|----------|--------|-------|
| rs1184798 | 14 | 103303514 | T | C | 0.7849 | 0.0208  | 0.0025 | 1.20E-16 | 387338 | 69.2  |
| rs7166534 | 15 | 47678132  | T | C | 0.7873 | 0.0228  | 0.0025 | 1.50E-19 | 387338 | 83.2  |
| rs783544  | 15 | 83240293  | A | C | 0.2505 | -0.0148 | 0.0024 | 3.50E-10 | 387338 | 38.0  |
| rs4702    | 15 | 91426560  | G | A | 0.4434 | -0.0172 | 0.0021 | 1.10E-16 | 387338 | 67.1  |
| rs1014403 | 15 | 97505901  | G | A | 0.5859 | 0.013   | 0.0021 | 8.00E-10 | 387338 | 38.3  |
| rs763053  | 16 | 735921    | T | C | 0.7749 | -0.0163 | 0.0025 | 4.90E-11 | 387338 | 42.5  |
| rs9923553 | 16 | 5825579   | A | G | 0.7092 | 0.0139  | 0.0023 | 3.80E-10 | 387338 | 36.5  |
| rs2870488 | 16 | 12350434  | T | C | 0.3243 | -0.0125 | 0.0022 | 1.80E-08 | 387338 | 32.3  |
| rs1107524 | 16 | 15116156  | C | T | 0.3838 | -0.0126 | 0.0023 | 3.20E-08 | 387338 | 30.0  |
| rs7188873 | 16 | 24727064  | A | G | 0.3768 | 0.0146  | 0.0021 | 5.80E-12 | 387338 | 48.3  |
| rs1244873 | 16 | 49622284  | C | T | 0.8580 | 0.0179  | 0.003  | 2.10E-09 | 387338 | 35.6  |
| rs7651377 | 16 | 72505534  | T | C | 0.8713 | -0.024  | 0.0031 | 4.90E-15 | 387338 | 59.9  |
| rs1244665 | 16 | 75607378  | G | A | 0.9451 | -0.0266 | 0.0045 | 5.50E-09 | 387338 | 34.9  |
| rs410520  | 17 | 4938924   | C | T | 0.4462 | -0.0113 | 0.0021 | 4.60E-08 | 387338 | 29.0  |
| rs3853548 | 17 | 21244607  | A | G | 0.4873 | -0.0118 | 0.0021 | 4.10E-08 | 387338 | 31.6  |
| rs2840636 | 17 | 47454507  | C | T | 0.6229 | 0.0165  | 0.0021 | 8.10E-15 | 387338 | 61.7  |
| rs6504551 | 17 | 65903326  | T | G | 0.7363 | 0.0149  | 0.0023 | 1.10E-10 | 387338 | 42.0  |
| rs7503604 | 17 | 79095629  | C | A | 0.4884 | -0.0129 | 0.0021 | 6.10E-10 | 387338 | 37.7  |
| rs4800204 | 18 | 22647270  | C | T | 0.4315 | 0.0125  | 0.0021 | 4.60E-09 | 387338 | 35.4  |
| rs2849767 | 18 | 36959684  | A | T | 0.3252 | 0.0155  | 0.0022 | 4.60E-12 | 387338 | 49.6  |
| rs5639397 | 18 | 39265197  | G | T | 0.8979 | -0.0204 | 0.0034 | 1.70E-09 | 387338 | 36.0  |
| rs1485443 | 18 | 40323567  | C | T | 0.9794 | -0.0435 | 0.0073 | 2.50E-09 | 387338 | 35.5  |
| rs3415504 | 18 | 44797697  | C | T | 0.5771 | -0.0142 | 0.0021 | 1.80E-11 | 387338 | 45.7  |
| rs2119839 | 18 | 52477074  | G | A | 0.3968 | -0.0139 | 0.0021 | 2.80E-11 | 387338 | 43.8  |
| rs9964201 | 18 | 50600552  | C | A | 0.9178 | -0.0262 | 0.0038 | 4.20E-12 | 387338 | 47.5  |
| rs1031831 | 18 | 53347258  | C | A | 0.6677 | 0.0155  | 0.0022 | 1.20E-12 | 387338 | 49.6  |
| rs7236339 | 18 | 77579773  | G | A | 0.7714 | 0.0201  | 0.0025 | 3.90E-16 | 387338 | 64.6  |
| rs1085398 | 19 | 4965064   | G | A | 0.6690 | 0.0123  | 0.0022 | 1.00E-08 | 387338 | 31.3  |
| rs4804512 | 19 | 10707892  | A | G | 0.2351 | -0.0137 | 0.0025 | 1.60E-08 | 387338 | 30.0  |
| rs807478  | 19 | 36252494  | A | G | 0.5038 | -0.0122 | 0.0021 | 1.90E-09 | 387338 | 33.8  |
| rs1178311 | 20 | 14731057  | C | T | 0.9703 | 0.0356  | 0.0064 | 3.40E-08 | 387338 | 30.9  |
| rs2145108 | 20 | 29457692  | G | T | 0.7408 | -0.0133 | 0.0025 | 4.70E-08 | 387338 | 28.3  |
| rs6058613 | 20 | 30864279  | C | G | 0.1615 | 0.0171  | 0.0028 | 1.80E-09 | 387338 | 37.3  |
| rs211041  | 20 | 31932068  | A | G | 0.2949 | 0.0133  | 0.0023 | 2.70E-09 | 387338 | 33.4  |
| rs1609598 | 20 | 51510926  | C | T | 0.6488 | 0.0122  | 0.0022 | 3.30E-08 | 387338 | 30.8  |
| rs4809346 | 20 | 62434142  | T | C | 0.8424 | -0.0179 | 0.003  | 1.20E-09 | 387338 | 35.6  |
| rs7528133 | 21 | 40641262  | T | C | 0.9574 | -0.0322 | 0.0058 | 3.10E-08 | 387338 | 30.8  |
| rs7473421 | 23 | 53102956  | A | T | 0.8060 | -0.0134 | 0.0022 | 1.50E-09 | 387338 | 37.1  |
| rs6259979 | 23 | 101286946 | G | A | 0.8096 | 0.0122  | 0.0022 | 4.80E-08 | 387338 | 30.8  |
| rs1468520 | 23 | 129118809 | G | A | 0.8594 | -0.0165 | 0.0025 | 3.70E-11 | 387338 | 43.6  |
| rs6637831 | 23 | 130423688 | G | A | 0.5280 | -0.0178 | 0.0017 | 6.20E-25 | 387338 | 109.6 |
| rs961522  | 2  | 58272502  | T | C | 0.3927 | -0.0125 | 0.0021 | 8.60E-23 | 387338 | 35.4  |



|           |    |           |   |   |        |         |        |          |        |      |
|-----------|----|-----------|---|---|--------|---------|--------|----------|--------|------|
| rs7349386 | 2  | 213773970 | T | C | 0.9509 | -0.0178 | 0.0048 | 1.50E-08 | 387338 | 13.8 |
| rs7608187 | 2  | 50602587  | G | A | 0.5812 | 0.0112  | 0.0021 | 1.10E-10 | 387338 | 28.4 |
| rs3448114 | 2  | 185607757 | A | G | 0.8520 | -0.0138 | 0.0029 | 7.20E-09 | 387338 | 22.6 |
| rs7024334 | 9  | 109072075 | T | G | 0.2203 | -0.0157 | 0.0025 | 4.10E-14 | 387338 | 39.4 |
| rs1103886 | 11 | 46355932  | C | G | 0.7133 | 0.0142  | 0.0023 | 8.90E-15 | 387338 | 38.1 |
| rs7670207 | 11 | 85398919  | T | A | 0.9568 | -0.0232 | 0.0051 | 1.30E-09 | 387338 | 20.7 |
| rs590648  | 11 | 119753355 | T | G | 0.3149 | -0.0091 | 0.0023 | 2.50E-08 | 387338 | 15.7 |
| rs2039916 | 13 | 112238863 | A | C | 0.4729 | 0.0072  | 0.0021 | 3.90E-08 | 387338 | 11.8 |
| rs1435757 | 15 | 47895902  | C | A | 0.4755 | -0.0152 | 0.0021 | 3.10E-14 | 387338 | 52.4 |

Chr, chromosome; EA, effect allele; EAF, effect allele frequency; NEA, non-effect allele.

\*N refers to the sample size of the initial GWAS from which the genetic variants were selected.

Table 3. Associations of single nucleotide polymorphisms for age at first birth.

| SNP       | Chr | Position  | EA | NEA | EAF    | Beta    | SE     | p-value  | N      | F-statistic |
|-----------|-----|-----------|----|-----|--------|---------|--------|----------|--------|-------------|
| rs1240743 | 1   | 22347396  | A  | G   | 0.8302 | -0.0754 | 0.0138 | 4.37E-08 | 464846 | 29.9        |
| rs2906457 | 1   | 44338575  | A  | C   | 0.2654 | -0.0649 | 0.0103 | 2.92E-10 | 536976 | 39.7        |
| rs2069278 | 1   | 66635371  | T  | C   | 0.6791 | 0.0576  | 0.0097 | 3.13E-09 | 536977 | 35.3        |
| rs6677536 | 1   | 73837958  | A  | C   | 0.6213 | 0.0553  | 0.0101 | 3.85E-08 | 500306 | 30.0        |
| rs1739169 | 1   | 78623626  | T  | C   | 0.1441 | -0.083  | 0.0135 | 8.15E-10 | 527694 | 37.8        |
| rs693691  | 1   | 88845494  | T  | C   | 0.137  | 0.077   | 0.0135 | 1.26E-08 | 541020 | 32.5        |
| rs10559   | 1   | 153920564 | G  | A   | 0.3023 | 0.0804  | 0.0106 | 3.70E-14 | 475568 | 57.5        |
| rs7516843 | 1   | 210322929 | A  | G   | 0.6832 | -0.0611 | 0.0097 | 3.12E-10 | 541020 | 39.7        |
| rs1188764 | 2   | 5891511   | A  | G   | 0.7631 | -0.0707 | 0.0112 | 2.25E-10 | 505809 | 39.8        |
| rs7277969 | 2   | 12797853  | T  | C   | 0.1222 | -0.0849 | 0.0145 | 4.87E-09 | 530568 | 34.3        |
| rs1606974 | 2   | 51873599  | A  | G   | 0.1325 | 0.0747  | 0.0137 | 4.61E-08 | 541022 | 29.7        |
| rs1342073 | 2   | 53007398  | A  | T   | 0.3807 | 0.0595  | 0.0104 | 1.22E-08 | 302093 | 32.7        |
| rs359247  | 2   | 60477052  | A  | T   | 0.3676 | 0.0682  | 0.0102 | 2.08E-11 | 475568 | 44.7        |
| rs1189346 | 2   | 104158394 | C  | T   | 0.5223 | 0.0603  | 0.0095 | 2.26E-10 | 506256 | 40.3        |
| rs8015328 | 2   | 156465747 | A  | C   | 0.0299 | 0.2314  | 0.0411 | 1.74E-08 | 514480 | 31.7        |
| rs1122825 | 2   | 166250414 | A  | G   | 0.7545 | -0.0631 | 0.0112 | 1.57E-08 | 500306 | 31.7        |
| rs2116097 | 3   | 17912087  | G  | A   | 0.4569 | -0.0603 | 0.0098 | 9.14E-10 | 475568 | 37.9        |
| rs1125127 | 3   | 24905460  | T  | G   | 0.9114 | -0.0965 | 0.0175 | 3.50E-08 | 530568 | 30.4        |
| rs1171352 | 3   | 45422308  | A  | C   | 0.3085 | 0.0464  | 0.0098 | 1.14E-09 | 541022 | 22.4        |
| rs6226208 | 3   | 47653822  | T  | C   | 0.2551 | -0.0699 | 0.0107 | 7.09E-11 | 530568 | 42.7        |
| rs3172494 | 3   | 48731487  | T  | G   | 0.1161 | 0.1341  | 0.0152 | 8.63E-19 | 503719 | 77.8        |
| rs9838987 | 3   | 49916044  | A  | G   | 0.5039 | 0.1175  | 0.0098 | 5.55E-33 | 487702 | 143.8       |
| rs1141428 | 3   | 51191466  | T  | C   | 0.0936 | 0.1077  | 0.0182 | 3.58E-09 | 491743 | 35.0        |
| rs1191593 | 3   | 74883069  | A  | G   | 0.1828 | 0.073   | 0.0122 | 2.25E-09 | 510334 | 35.8        |
| rs1452180 | 3   | 83504521  | C  | T   | 0.1877 | -0.0673 | 0.0122 | 3.46E-08 | 506256 | 30.4        |
| rs7623497 | 3   | 84666585  | A  | G   | 0.4264 | -0.0583 | 0.01   | 5.03E-09 | 475568 | 34.0        |
| rs6226174 | 3   | 85958954  | C  | G   | 0.6917 | -0.0576 | 0.0104 | 2.85E-08 | 512484 | 30.7        |

|            |    |           |   |   |        |         |        |          |        |      |
|------------|----|-----------|---|---|--------|---------|--------|----------|--------|------|
| rs9818010  | 3  | 132558241 | T | G | 0.2823 | 0.063   | 0.0102 | 5.63E-10 | 532196 | 38.1 |
| rs6175081  | 4  | 77053834  | T | C | 0.8366 | 0.0796  | 0.0129 | 6.32E-10 | 524858 | 38.1 |
| rs1731480  | 4  | 140946828 | T | C | 0.3567 | 0.0662  | 0.0095 | 2.67E-12 | 536237 | 48.6 |
| rs3403355  | 4  | 159674014 | G | C | 0.6319 | 0.0603  | 0.0106 | 1.08E-08 | 457482 | 32.4 |
| rs3392039  | 5  | 24900760  | T | C | 0.7232 | 0.0573  | 0.0104 | 3.93E-08 | 530568 | 30.4 |
| rs1690206  | 5  | 45255478  | T | A | 0.1647 | -0.0801 | 0.0129 | 5.92E-10 | 506256 | 38.6 |
| rs1124222  | 5  | 133875033 | A | G | 0.7894 | -0.0686 | 0.0122 | 1.67E-08 | 483177 | 31.6 |
| rs1116775  | 5  | 140989410 | T | C | 0.7113 | 0.0574  | 0.01   | 1.04E-08 | 538858 | 32.9 |
| rs1216394  | 5  | 155848785 | T | C | 0.6022 | -0.0623 | 0.0103 | 1.76E-09 | 457484 | 36.6 |
| rs6923535  | 6  | 19859654  | A | G | 0.4443 | -0.052  | 0.0093 | 2.12E-08 | 530568 | 31.3 |
| rs34137317 | 6  | 31604894  | T | C | 0.0277 | 0.2473  | 0.04   | 6.15E-10 | 468917 | 38.2 |
| rs9276427  | 6  | 32711857  | T | C | 0.5217 | 0.0532  | 0.0096 | 3.29E-08 | 497401 | 30.7 |
| rs1981258  | 6  | 63711033  | T | C | 0.6467 | 0.0586  | 0.0106 | 2.88E-08 | 457484 | 30.6 |
| rs9372625  | 6  | 98344031  | A | G | 0.3672 | -0.0719 | 0.0102 | 2.14E-12 | 475568 | 49.7 |
| rs6925118  | 6  | 143165488 | A | G | 0.8064 | -0.0676 | 0.0118 | 1.11E-08 | 530568 | 32.8 |
| rs1220471  | 6  | 152235339 | T | C | 0.6361 | -0.0891 | 0.0099 | 2.90E-19 | 506256 | 81.0 |
| rs1464534  | 7  | 3505092   | C | G | 0.2965 | -0.0606 | 0.0099 | 1.00E-09 | 541020 | 37.5 |
| rs1773140  | 7  | 49854560  | A | G | 0.8464 | 0.0735  | 0.0129 | 1.21E-08 | 537447 | 32.5 |
| rs7892866  | 7  | 71782460  | A | G | 0.9553 | -0.142  | 0.0259 | 4.22E-08 | 529196 | 30.1 |
| rs1132471  | 7  | 140182514 | T | C | 0.6961 | -0.0641 | 0.0115 | 2.68E-08 | 461215 | 31.1 |
| rs1124993  | 8  | 9556500   | A | G | 0.6107 | 0.0633  | 0.0099 | 1.56E-10 | 499880 | 40.9 |
| rs3518028  | 8  | 91190780  | C | T | 0.2935 | 0.0642  | 0.0114 | 1.81E-08 | 457484 | 31.7 |
| rs7865801  | 9  | 14745886  | A | G | 0.6329 | 0.0536  | 0.0097 | 3.35E-08 | 526995 | 30.5 |
| rs1096255  | 9  | 16723742  | T | C | 0.1693 | -0.0707 | 0.0128 | 3.12E-08 | 531520 | 30.5 |
| rs1590949  | 9  | 23360417  | C | G | 0.5919 | -0.0583 | 0.0095 | 8.24E-10 | 530568 | 37.7 |
| rs1125359  | 9  | 140278206 | A | C | 0.1285 | -0.0893 | 0.0163 | 4.45E-08 | 437423 | 30.0 |
| rs4917916  | 10 | 102673292 | A | G | 0.2016 | -0.0658 | 0.0119 | 3.48E-08 | 506256 | 30.6 |
| rs1078683  | 10 | 106614571 | G | A | 0.6008 | 0.0604  | 0.0101 | 1.99E-09 | 475568 | 35.8 |
| rs6585429  | 10 | 118893231 | A | G | 0.1877 | -0.084  | 0.0124 | 1.08E-11 | 509779 | 45.9 |
| rs4244533  | 11 | 28008972  | A | G | 0.7988 | -0.0719 | 0.0119 | 1.33E-09 | 500807 | 36.5 |
| rs1236159  | 11 | 30327006  | A | G | 0.1448 | -0.0787 | 0.0142 | 2.78E-08 | 475568 | 30.7 |
| rs933738   | 12 | 49943122  | A | G | 0.816  | -0.0698 | 0.0122 | 1.10E-08 | 530568 | 32.7 |
| rs1702877  | 12 | 56427808  | T | C | 0.3383 | 0.0602  | 0.0098 | 8.22E-10 | 530568 | 37.7 |
| rs1077903  | 12 | 84109981  | C | A | 0.3594 | 0.0736  | 0.01   | 1.90E-13 | 506256 | 54.2 |
| rs1281561  | 12 | 121407256 | A | G | 0.6653 | -0.0564 | 0.0097 | 5.75E-09 | 536978 | 33.8 |
| rs9540715  | 13 | 66913378  | A | C | 0.4645 | 0.0588  | 0.01   | 4.74E-09 | 475546 | 34.6 |
| rs9561311  | 13 | 93978321  | G | A | 0.1468 | 0.0821  | 0.0147 | 2.29E-08 | 457484 | 31.2 |
| rs6574018  | 14 | 72213258  | T | G | 0.3623 | 0.0556  | 0.01   | 2.42E-08 | 499879 | 30.9 |
| rs2224234  | 14 | 103382038 | A | C | 0.7967 | 0.0851  | 0.0124 | 6.64E-12 | 466188 | 47.1 |
| rs8030494  | 15 | 74092777  | A | C | 0.606  | 0.0545  | 0.0096 | 1.30E-08 | 511260 | 32.2 |
| rs1121780  | 17 | 29261788  | T | C | 0.1893 | -0.0677 | 0.0122 | 3.25E-08 | 506256 | 30.8 |
| rs5743204  | 17 | 29241038  | T | C | 0.8982 | -0.0905 | 0.0165 | 4.57E-08 | 499880 | 30.1 |

|           |    |           |   |   |        |         |        |          |        |      |
|-----------|----|-----------|---|---|--------|---------|--------|----------|--------|------|
| rs1044536 | 17 | 43932797  | C | G | 0.1843 | -0.0886 | 0.0136 | 6.69E-11 | 453938 | 42.4 |
| rs7359501 | 17 | 56641200  | T | C | 0.4091 | 0.0565  | 0.0094 | 1.82E-09 | 530568 | 36.1 |
| rs6022268 | 18 | 36510587  | T | C | 0.2037 | -0.0646 | 0.0117 | 3.51E-08 | 530568 | 30.5 |
| rs590076  | 18 | 53260732  | A | G | 0.3505 | -0.0553 | 0.0095 | 5.78E-09 | 536239 | 33.9 |
| rs8110682 | 19 | 13285293  | T | C | 0.6348 | -0.0695 | 0.011  | 2.59E-10 | 457959 | 39.9 |
| rs293566  | 20 | 31097877  | T | C | 0.6472 | 0.0694  | 0.0099 | 2.18E-12 | 505549 | 49.1 |
| rs2253763 | 21 | 46642764  | T | C | 0.4001 | 0.0534  | 0.0098 | 4.58E-08 | 494963 | 29.7 |
| rs5763436 | 22 | 30121577  | A | T | 0.5902 | 0.0542  | 0.0097 | 1.94E-08 | 492248 | 31.2 |
| rs5932889 | 23 | 130436456 | C | G | 0.6473 | -0.0896 | 0.0119 | 4.88E-14 | 431450 | 56.7 |
| rs183103  | 23 | 131768905 | T | C | 0.7001 | 0.0887  | 0.0122 | 4.27E-13 | 431450 | 52.9 |
| rs1283717 | 23 | 51117172  | A | C | 0.8139 | 0.083   | 0.0146 | 1.38E-08 | 426927 | 32.3 |
| rs1442451 | 23 | 136982365 | A | G | 0.0826 | 0.1629  | 0.0295 | 3.46E-08 | 422166 | 30.5 |

Chr, chromosome; EA, effect allele; EAF, effect allele frequency; NEA, non-effect allele.

Table 4. Proxies used for SNPs that was not available for an outcome.

| SNP                     | Proxies     | R <sup>2</sup> | SNP                       | Proxies    | R <sup>2</sup> |
|-------------------------|-------------|----------------|---------------------------|------------|----------------|
| <b>Age at first sex</b> |             |                | <b>Age at first birth</b> |            |                |
| rs111991969             | None        |                | rs34137317                | None       |                |
| rs199769930             | None        |                | rs5932889                 | None       |                |
| rs577722844             | None        |                | rs183103                  | None       |                |
| rs10137654              | None        |                | rs12837176                | None       |                |
| rs7473421               | None        |                | rs144245162               | None       |                |
| rs62599791              | None        |                | rs112535944               | None       |                |
| rs146852038             | None        |                | rs80153284                | None       |                |
| rs6637831               | None        |                | rs9276427                 | None       |                |
| rs79764489              | None        |                | rs11242222                | rs62381443 | 0.697          |
| rs73581580              | None        |                | rs35180283                | rs11776764 | 0.995          |
| rs28929474              | None        |                |                           |            |                |
| rs148544378             | None        |                |                           |            |                |
| rs1146566               | rs1222923   | 0.984          |                           |            |                |
| rs12878359              | rs12879717  | 0.779          |                           |            |                |
| rs1014403               | rs1014402   | 0.996          |                           |            |                |
| rs4809346               | rs4809345   | 0.958          |                           |            |                |
| rs245753                | rs245754    | 1              |                           |            |                |
| rs372420182             | rs147678290 | 1              |                           |            |                |
| rs7943198               | rs4294596   | 0.996          |                           |            |                |
| rs2145108               | rs6118976   | 0.927          |                           |            |                |
| rs2039916               | rs6492373   | 1              |                           |            |                |
| rs3853548               | rs16942379  | 0.861          |                           |            |                |

Table 5. Mendelian randomization association of genetically predicted age at first sex with cardiovascular diseases.

| Cardiovascular disease  | Weighted median method |              |                 | MR-Egger regression method |              |                 |           |                 |
|-------------------------|------------------------|--------------|-----------------|----------------------------|--------------|-----------------|-----------|-----------------|
|                         | OR                     | 95% CI       | <i>p</i> -value | OR                         | 95% CI       | <i>p</i> -value | Intercept | <i>p</i> -value |
| Heart failure           | 0.746                  | 0.665, 0.837 | 6.17E-07        | 0.875                      | 0.600, 1.275 | 0.487           | -0.004    | 0.234           |
| Coronary artery disease | 0.697                  | 0.611, 0.796 | 9.94E-08        | 0.807                      | 0.526, 1.236 | 0.325           | -0.002    | 0.629           |
| Myocardial infarction   | 0.721                  | 0.624, 0.834 | 9.72E-06        | 0.710                      | 0.456, 1.105 | 0.130           | 4.57E-04  | 0.897           |
| Stroke                  | 0.778                  | 0.691, 0.877 | 3.60E-05        | 0.990                      | 0.686, 1.427 | 0.955           | -0.005    | 0.122           |
| Atrial fibrillation     | 0.903                  | 0.816, 1.000 | 0.049           | 1.003                      | 0.726, 1.386 | 0.985           | -0.002    | 0.377           |

Table 6. Heterogeneity test by using MR Egger method for each outcome.

| Exposure         | Outcomes                | Heterogeneity |      |                 |                    |
|------------------|-------------------------|---------------|------|-----------------|--------------------|
|                  |                         | Q             | O_df | <i>p</i> -value | I <sup>2</sup> (%) |
| Age at first sex | Heart failure           | 378.1         | 249  | 2.37E-07        | 34.1               |
|                  | Coronary artery disease | 352.3         | 248  | 1.45E-05        | 29.6               |
|                  | Myocardial infarction   | 307.5         | 248  | 0.006           | 19.3               |
|                  | Stroke                  | 336.5         | 248  | 1.54E-04        | 26.3               |
|                  | Atrial fibrillation     | 343.2         | 249  | 6.90E-05        | 27.4               |

Table 7. Mendelian randomization association of genetically predicted age at first sex with ischemic stroke and ischemic stroke subtypes.

| Exposure             | Outcome                   | Method                    | OR           | 95% CI       | <i>p</i> -value |
|----------------------|---------------------------|---------------------------|--------------|--------------|-----------------|
| Age at first sex     | Any ischemic stroke       | Inverse-variance weighted | 0.747        | 0.682, 0.819 | 3.75E-10        |
|                      |                           | Weighted median           | 0.784        | 0.695, 0.884 | 6.91E-05        |
|                      |                           | MR Egger                  | 0.941        | 0.643, 1.377 | 0.754           |
|                      | large-artery stroke       | Inverse-variance weighted | 0.669        | 0.545, 0.821 | 1.21E-04        |
|                      |                           | Weighted median           | 0.714        | 0.536, 0.951 | 0.021           |
|                      |                           | MR Egger                  | 0.461        | 0.195, 1.093 | 0.080           |
|                      | Small-vessel stroke       | Inverse-variance weighted | 0.755        | 0.639, 0.893 | 9.87E-04        |
|                      |                           | Weighted median           | 0.821        | 0.641, 1.053 | 0.120           |
|                      |                           | MR Egger                  | 0.999        | 0.484, 2.061 | 0.998           |
| Cardioembolic stroke | Inverse-variance weighted | 0.830                     | 0.699, 0.986 | 0.034        |                 |
|                      | Weighted median           | 0.873                     | 0.677, 1.126 | 0.297        |                 |
|                      | MR Egger                  | 1.660                     | 0.803, 3.434 | 0.173        |                 |

Table 8. The genetic liability to age at first sex with cardiovascular risk factors.

| Exposure         | Outcomes             | SNP | IVW<br>OR (95% CI)   | p-value   |
|------------------|----------------------|-----|----------------------|-----------|
| Age at first sex | Smoking              | 243 | 0.487 (0.455, 0.520) | 2.54E-101 |
|                  | Alcohol intake       | 243 | 0.892 (0.867, 0.918) | 3.97E-15  |
|                  | Body mass index      | 196 | 0.755 (0.705, 0.809) | 1.03E-15  |
|                  | Depression           | 237 | 0.702 (0.656, 0.751) | 1.38E-24  |
|                  | Education attainment | 221 | 1.548 (1.491, 1.608) | 5.54E-115 |

Table 9. Mediation effect of education attainment on age at first sex-CVDs association.

| Outcomes                | Total Effect            | Mediation Effect       |          | Mediated Proportion |
|-------------------------|-------------------------|------------------------|----------|---------------------|
|                         | Effect Size (95%CI)     | Effect Size (95%CI)    | p-value  | (%) (95% CI)        |
| <b>Age at first sex</b> |                         |                        |          |                     |
| Heart failure           | -0.356 (-0.447, -0.265) | -0.080 (-0.142 -0.019) | 0.010    | 22.6 (5.4, 39.8)    |
| Coronary artery disease | -0.317 (-0.420, -0.214) | -0.134 (-0.211 -0.058) | 5.64E-04 | 42.3 (18.3, 66.4)   |
| Myocardial infarction   | -0.314 (-0.421, -0.207) | -0.139 (-0.220 -0.058) | 8.19E-04 | 44.3 (18.4, 70.3)   |
| Stroke                  | -0.292 (-0.379, -0.204) | -0.102 (-0.163 -0.041) | 9.89E-04 | 34.9 (14.2, 55.7)   |
| Atrial fibrillation     | -0.139 (-0.216, -0.061) | 0.002 (-0.065 0.069)   | 0.959    | -1.3 (-49.5, 46.9)  |

Table 10. Associations of single nucleotide polymorphisms for age at first sex, in female only.

| SNP         | Chr | Position  | EA | NEA | EAF    | Beta    | SE     | p-value  | N*      | F-statistic |
|-------------|-----|-----------|----|-----|--------|---------|--------|----------|---------|-------------|
| rs141655075 | 1   | 87794596  | C  | T   | 0.9611 | 0.0424  | 0.0072 | 5.10E-09 | 214,547 | 34.7        |
| rs11240331  | 1   | 204968339 | C  | T   | 0.7383 | -0.0185 | 0.0032 | 5.10E-09 | 214,547 | 33.8        |
| rs67446571  | 2   | 22554648  | A  | G   | 0.6304 | 0.0174  | 0.0029 | 1.20E-09 | 214,547 | 36.6        |
| rs56254887  | 2   | 44842184  | T  | A   | 0.3797 | 0.0177  | 0.0028 | 9.30E-10 | 214,547 | 38.5        |
| rs9789483   | 2   | 58492345  | A  | G   | 0.6351 | 0.0274  | 0.0029 | 1.80E-21 | 214,547 | 90.6        |
| rs6719762   | 2   | 60166832  | T  | C   | 0.5258 | 0.0245  | 0.0028 | 6.90E-19 | 214,547 | 77.7        |
| rs359243    | 2   | 60475509  | T  | C   | 0.3918 | 0.0205  | 0.0028 | 6.30E-13 | 214,547 | 51.7        |
| rs12328348  | 2   | 60785937  | A  | G   | 0.5583 | -0.0162 | 0.0028 | 1.40E-08 | 214,547 | 32.5        |
| rs62180269  | 2   | 63320524  | T  | C   | 0.7815 | -0.0195 | 0.0034 | 4.10E-09 | 214,547 | 33.8        |
| rs11678980  | 2   | 162101261 | G  | A   | 0.5374 | 0.0156  | 0.0029 | 3.30E-08 | 214,547 | 29.8        |
| rs7575189   | 2   | 174015168 | G  | A   | 0.4108 | -0.0176 | 0.0028 | 2.30E-10 | 214,547 | 39.1        |
| rs67723420  | 3   | 35775115  | T  | A   | 0.6251 | -0.0166 | 0.0029 | 4.30E-09 | 214,547 | 33.5        |
| rs111599092 | 3   | 49502779  | A  | G   | 0.1147 | 0.0353  | 0.0045 | 1.10E-14 | 214,547 | 60.5        |
| rs2188151   | 3   | 50201924  | G  | T   | 0.5753 | 0.0190  | 0.0028 | 1.10E-11 | 214,547 | 45.9        |
| rs186723454 | 3   | 54156598  | A  | G   | 0.8491 | 0.0222  | 0.0039 | 1.80E-08 | 214,547 | 32.5        |
| rs12714592  | 3   | 84387950  | A  | C   | 0.7265 | 0.0242  | 0.0031 | 7.50E-15 | 214,547 | 60.9        |
| rs112523595 | 3   | 85650341  | T  | C   | 0.3707 | -0.0200 | 0.0029 | 5.00E-12 | 214,547 | 47.8        |
| rs12714702  | 3   | 88249922  | A  | G   | 0.1596 | 0.0247  | 0.0038 | 7.50E-11 | 214,547 | 43.1        |
| rs1377276   | 3   | 107948019 | C  | G   | 0.4161 | 0.0181  | 0.0028 | 1.50E-10 | 214,547 | 40.3        |
| rs57945129  | 3   | 117641724 | C  | T   | 0.8514 | -0.0236 | 0.0039 | 1.40E-09 | 214,547 | 36.6        |

|             |    |           |   |   |        |         |        |          |         |       |
|-------------|----|-----------|---|---|--------|---------|--------|----------|---------|-------|
| rs16859457  | 3  | 147161075 | A | G | 0.6151 | -0.0199 | 0.0031 | 3.10E-10 | 214,547 | 40.5  |
| rs11729080  | 4  | 112503872 | G | A | 0.8283 | -0.0224 | 0.0037 | 1.10E-09 | 214,547 | 37.4  |
| rs809955    | 4  | 140874760 | G | A | 0.6332 | -0.0172 | 0.0029 | 1.20E-09 | 214,547 | 35.8  |
| rs2910032   | 5  | 152540354 | C | T | 0.4813 | -0.0174 | 0.0028 | 2.40E-10 | 214,547 | 39.2  |
| rs12203592  | 6  | 396321    | C | T | 0.7806 | -0.0206 | 0.0034 | 4.60E-09 | 214,547 | 35.9  |
| rs12204714  | 6  | 152235339 | C | T | 0.3679 | -0.0288 | 0.0029 | 6.30E-24 | 214,547 | 100.1 |
| rs6951209   | 7  | 1273821   | T | A | 0.2253 | 0.0214  | 0.0034 | 3.50E-10 | 214,547 | 39.5  |
| rs4552798   | 7  | 1928001   | C | T | 0.4618 | -0.0182 | 0.0029 | 1.30E-10 | 214,547 | 40.6  |
| rs7785195   | 7  | 3424686   | G | A | 0.3415 | -0.0167 | 0.0029 | 1.10E-08 | 214,547 | 32.9  |
| rs198310    | 7  | 24191861  | A | T | 0.7854 | -0.0200 | 0.0034 | 3.50E-09 | 214,547 | 34.8  |
| rs6962772   | 7  | 99081730  | A | G | 0.8460 | -0.0253 | 0.0039 | 9.70E-11 | 214,547 | 43.0  |
| rs7783012   | 7  | 114116881 | G | A | 0.4070 | 0.0163  | 0.0028 | 8.10E-09 | 214,547 | 33.0  |
| rs11770163  | 7  | 116417848 | G | C | 0.6685 | 0.0167  | 0.0029 | 2.20E-08 | 214,547 | 32.1  |
| rs113367286 | 7  | 140144414 | C | T | 0.7208 | -0.0172 | 0.0031 | 1.20E-08 | 214,547 | 31.0  |
| rs6997641   | 8  | 86676101  | C | T | 0.1738 | -0.0224 | 0.0037 | 4.90E-10 | 214,547 | 37.4  |
| rs3896224   | 10 | 106467853 | A | G | 0.5879 | -0.0210 | 0.0028 | 7.00E-14 | 214,547 | 54.6  |
| rs10749233  | 10 | 118777998 | G | C | 0.2361 | -0.0195 | 0.0033 | 7.30E-09 | 214,547 | 34.4  |
| rs7079070   | 10 | 134182921 | G | A | 0.5461 | 0.0164  | 0.0028 | 4.50E-09 | 214,547 | 34.9  |
| rs10835387  | 11 | 28671629  | G | C | 0.6557 | -0.0177 | 0.0029 | 1.60E-09 | 214,547 | 36.9  |
| rs34804222  | 11 | 43771084  | A | G | 0.5935 | -0.0164 | 0.0028 | 2.90E-09 | 214,547 | 33.8  |
| rs1472874   | 12 | 24575272  | T | C | 0.8059 | -0.0210 | 0.0037 | 2.50E-08 | 214,547 | 31.9  |
| rs61960829  | 13 | 57267105  | G | A | 0.9412 | 0.0324  | 0.0059 | 4.40E-08 | 214,547 | 29.9  |
| rs12147463  | 14 | 41059928  | G | A | 0.8072 | 0.0269  | 0.0036 | 5.20E-14 | 214,547 | 57.4  |
| rs3007104   | 14 | 47367434  | G | A | 0.5768 | 0.0152  | 0.0028 | 4.50E-08 | 214,547 | 29.2  |
| rs76715069  | 14 | 98597420  | G | C | 0.7918 | 0.0226  | 0.0034 | 2.10E-11 | 214,547 | 43.4  |
| rs11847989  | 14 | 103303514 | T | C | 0.7848 | 0.0201  | 0.0034 | 1.70E-09 | 214,547 | 35.1  |
| rs7166534   | 15 | 47678132  | T | C | 0.7868 | 0.0202  | 0.0034 | 3.10E-09 | 214,547 | 35.3  |
| rs76513770  | 16 | 72505534  | T | C | 0.8714 | -0.0234 | 0.0041 | 8.50E-09 | 214,547 | 31.8  |
| rs28406364  | 17 | 47454507  | C | T | 0.6219 | 0.0200  | 0.0029 | 2.40E-12 | 214,547 | 48.5  |
| rs2849767   | 18 | 36959684  | A | T | 0.3254 | 0.0189  | 0.0030 | 3.20E-10 | 214,547 | 39.7  |
| rs148544378 | 18 | 40323567  | C | T | 0.9793 | -0.0551 | 0.0097 | 2.10E-08 | 214,547 | 32.1  |
| rs1031831   | 18 | 53351539  | C | A | 0.6683 | 0.0178  | 0.0029 | 1.00E-09 | 214,547 | 36.6  |
| rs7236339   | 18 | 77579773  | G | A | 0.7722 | 0.0196  | 0.0033 | 2.40E-09 | 214,547 | 34.7  |
| rs6637831   | 23 | 130423688 | G | A | 0.5279 | -0.0213 | 0.0028 | 2.20E-14 | 214,547 | 58.7  |
| rs961522    | 2  | 58272502  | T | C | 0.3925 | -0.0278 | 0.0028 | 8.60E-23 | 214,547 | 96.2  |
| rs7349386   | 2  | 213773970 | T | C | 0.9509 | -0.0369 | 0.0065 | 1.50E-08 | 214,547 | 32.6  |

Chr, chromosome; EA, effect allele; EAF, effect allele frequency; NEA, non-effect allele.

\*N refers to the sample size of the initial GWAS from which the genetic variants were selected.

Table 11. Associations of single nucleotide polymorphisms for age at first sex, in male only.

| SNP         | Chr | Position  | EA | NEA | EAF    | Beta    | SE     | p-value  | N*      | F-statistic |
|-------------|-----|-----------|----|-----|--------|---------|--------|----------|---------|-------------|
| rs35851551  | 7   | 31330785  | A  | G   | 0.8986 | 0.0301  | 0.0052 | 7.70E-09 | 182,791 | 33.5        |
| rs12701263  | 7   | 32962089  | C  | T   | 0.6006 | -0.0181 | 0.0032 | 4.60E-09 | 182,791 | 32.0        |
| rs794375    | 7   | 75147801  | T  | C   | 0.5741 | -0.0203 | 0.0032 | 1.20E-10 | 182,791 | 40.2        |
| rs13307225  | 7   | 105084671 | G  | A   | 0.1068 | -0.0293 | 0.005  | 8.10E-09 | 182,791 | 34.3        |
| rs7783012   | 7   | 114116881 | G  | A   | 0.4075 | 0.0235  | 0.0032 | 1.40E-13 | 182,791 | 53.9        |
| rs11767283  | 7   | 121947456 | A  | G   | 0.779  | 0.0222  | 0.0038 | 3.20E-09 | 182,791 | 34.1        |
| rs11772444  | 7   | 133453874 | G  | A   | 0.8101 | 0.0246  | 0.004  | 5.60E-10 | 182,791 | 37.8        |
| rs6966898   | 7   | 135221170 | C  | T   | 0.6674 | 0.0183  | 0.0033 | 3.70E-08 | 182,791 | 30.8        |
| rs113367286 | 7   | 140144414 | C  | T   | 0.7206 | -0.0194 | 0.0035 | 2.90E-08 | 182,791 | 30.7        |
| rs1991651   | 8   | 10706411  | C  | G   | 0.3814 | -0.0208 | 0.0032 | 5.10E-11 | 182,791 | 42.2        |
| rs35918434  | 8   | 91894514  | T  | C   | 0.7432 | 0.02    | 0.0035 | 1.90E-08 | 182,791 | 32.7        |
| rs13280592  | 8   | 116686752 | C  | G   | 0.2732 | 0.0195  | 0.0035 | 1.40E-08 | 182,791 | 31.0        |
| rs2090409   | 9   | 108967088 | C  | A   | 0.6516 | 0.0231  | 0.0033 | 2.70E-12 | 182,791 | 49.0        |
| rs61856978  | 10  | 97941022  | T  | C   | 0.6604 | 0.0202  | 0.0033 | 2.50E-10 | 182,791 | 37.5        |
| rs3896224   | 10  | 106467853 | A  | G   | 0.5876 | -0.0189 | 0.0032 | 2.20E-09 | 182,791 | 34.9        |
| rs61882758  | 11  | 46611805  | A  | G   | 0.7387 | 0.0267  | 0.0039 | 8.10E-12 | 182,791 | 46.9        |
| rs11040367  | 11  | 49450176  | G  | A   | 0.1487 | -0.0262 | 0.0047 | 2.50E-08 | 182,791 | 31.1        |
| rs7943198   | 11  | 112882179 | T  | G   | 0.6249 | 0.0191  | 0.0032 | 3.90E-09 | 182,791 | 35.6        |
| rs7955865   | 12  | 56468706  | A  | T   | 0.3522 | 0.0179  | 0.0032 | 3.20E-08 | 182,791 | 31.3        |
| rs341521    | 13  | 60399045  | G  | A   | 0.297  | 0.0194  | 0.0034 | 1.10E-08 | 182,791 | 32.6        |
| rs11847989  | 14  | 103303514 | T  | C   | 0.7849 | 0.0212  | 0.0038 | 1.00E-08 | 182,791 | 31.1        |
| rs7166534   | 15  | 47678132  | T  | C   | 0.788  | 0.0263  | 0.0038 | 3.30E-12 | 182,791 | 47.9        |
| rs4702      | 15  | 91426560  | G  | A   | 0.4431 | -0.0213 | 0.0031 | 7.10E-12 | 182,791 | 47.2        |
| rs7188873   | 16  | 24727064  | A  | G   | 0.3753 | 0.019   | 0.0032 | 4.10E-09 | 182,791 | 35.3        |
| rs76513770  | 16  | 72505534  | T  | C   | 0.8711 | -0.0264 | 0.0046 | 1.90E-08 | 182,791 | 32.9        |
| rs2119839   | 18  | 52477074  | G  | A   | 0.3965 | -0.0172 | 0.0032 | 2.80E-08 | 182,791 | 28.9        |
| rs7236339   | 18  | 77579773  | G  | A   | 0.7704 | 0.0224  | 0.0037 | 2.40E-09 | 182,791 | 36.7        |
| rs7473421   | 23  | 53102956  | A  | T   | 0.8054 | -0.0172 | 0.0028 | 1.10E-09 | 182,791 | 37.7        |
| rs146852038 | 23  | 129118809 | G  | A   | 0.8589 | -0.0177 | 0.0032 | 4.10E-08 | 182,791 | 30.6        |
| rs6637831   | 23  | 130423688 | G  | A   | 0.528  | -0.0157 | 0.0022 | 8.10E-13 | 182,791 | 50.9        |
| rs7608187   | 2   | 50602587  | G  | A   | 0.5815 | 0.0201  | 0.0031 | 1.10E-10 | 182,791 | 42.0        |
| rs34481141  | 2   | 185607757 | A  | G   | 0.8511 | -0.0253 | 0.0043 | 7.20E-09 | 182,791 | 34.6        |
| rs7024334   | 9   | 109072075 | T  | G   | 0.2212 | -0.0286 | 0.0037 | 4.10E-14 | 182,791 | 59.7        |
| rs11038866  | 11  | 46355932  | C  | G   | 0.7142 | 0.0267  | 0.0034 | 8.90E-15 | 182,791 | 61.7        |
| rs76702070  | 11  | 85398919  | T  | A   | 0.9567 | -0.0469 | 0.0077 | 1.30E-09 | 182,791 | 37.1        |
| rs590648    | 11  | 119753355 | T  | G   | 0.3147 | -0.0191 | 0.0034 | 2.50E-08 | 182,791 | 31.6        |
| rs2039916   | 13  | 112238863 | A  | C   | 0.4724 | 0.0173  | 0.0031 | 3.90E-08 | 182,791 | 31.1        |
| rs1435757   | 15  | 47895902  | C  | A   | 0.4741 | -0.0238 | 0.0031 | 3.10E-14 | 182,791 | 58.9        |

Chr, chromosome; EA, effect allele; EAF, effect allele frequency; NEA, non-effect allele.

\*N refers to the sample size of the initial GWAS from which the genetic variants were selected.

Table 12. Mendelian randomization association of genetically predicted age at first sex with cardiovascular diseases, in female only.

| <b>Exposure</b>                   | <b>Outcome</b>          | <b>Method</b>             | <b>OR</b> | <b>95% CI</b> | <b>p-value</b> |
|-----------------------------------|-------------------------|---------------------------|-----------|---------------|----------------|
| Age at first sex<br>(Female only) | Heart failure           | Inverse-variance weighted | 0.717     | 0.606, 0.848  | 9.92E-05       |
|                                   |                         | Weighted median           | 0.812     | 0.670, 0.984  | 0.033          |
|                                   |                         | MR Egger                  | 1.748     | 0.835, 3.662  | 0.145          |
|                                   | Myocardial infarction   | Inverse-variance weighted | 0.726     | 0.617, 0.855  | 1.21E-04       |
|                                   |                         | Weighted median           | 0.820     | 0.655, 1.026  | 0.083          |
|                                   |                         | MR Egger                  | 0.812     | 0.377, 1.751  | 0.598          |
|                                   | Coronary artery disease | Inverse-variance weighted | 0.762     | 0.649, 0.896  | 0.001          |
|                                   |                         | Weighted median           | 0.896     | 0.727, 1.103  | 0.301          |
|                                   |                         | MR Egger                  | 0.926     | 0.432, 1.982  | 0.843          |
|                                   | Stroke                  | Inverse-variance weighted | 0.789     | 0.695, 0.896  | 2.57E-04       |
|                                   |                         | Weighted median           | 0.807     | 0.676, 0.963  | 0.017          |
|                                   |                         | MR Egger                  | 1.331     | 0.729, 2.431  | 0.356          |
|                                   | Atrial fibrillation     | Inverse-variance weighted | 0.853     | 0.753, 0.966  | 0.012          |
|                                   |                         | Weighted median           | 0.834     | 0.711, 0.979  | 0.027          |
|                                   |                         | MR Egger                  | 1.704     | 0.970, 2.991  | 0.069          |

Table 13. Mendelian randomization association of genetically predicted age at first sex with cardiovascular diseases, in male only.

| <b>Exposure</b>                 | <b>Outcome</b>          | <b>Method</b>             | <b>OR</b> | <b>95% CI</b> | <b>p-value</b> |
|---------------------------------|-------------------------|---------------------------|-----------|---------------|----------------|
| Age at first sex<br>(Male only) | Heart failure           | Inverse-variance weighted | 0.706     | 0.582, 0.855  | 3.80E-04       |
|                                 |                         | Weighted median           | 0.683     | 0.549, 0.851  | 6.56E-04       |
|                                 |                         | MR Egger                  | 0.529     | 0.176, 1.587  | 0.264          |
|                                 | Myocardial infarction   | Inverse-variance weighted | 0.804     | 0.646, 1.001  | 0.051          |
|                                 |                         | Weighted median           | 0.824     | 0.631, 1.076  | 0.156          |
|                                 |                         | MR Egger                  | 0.843     | 0.238, 2.988  | 0.792          |
|                                 | Coronary artery disease | Inverse-variance weighted | 0.857     | 0.706, 1.041  | 0.119          |
|                                 |                         | Weighted median           | 0.856     | 0.665, 1.102  | 0.229          |
|                                 |                         | MR Egger                  | 0.888     | 0.290, 2.725  | 0.837          |
|                                 | Stroke                  | Inverse-variance weighted | 0.669     | 0.546, 0.819  | 1.02E-04       |
|                                 |                         | Weighted median           | 0.660     | 0.525, 0.831  | 3.97E-04       |
|                                 |                         | MR Egger                  | 0.689     | 0.211, 2.250  | 0.542          |
|                                 | Atrial fibrillation     | Inverse-variance weighted | 0.956     | 0.843, 1.084  | 0.482          |
|                                 |                         | Weighted median           | 0.939     | 0.784, 1.125  | 0.492          |
|                                 |                         | MR Egger                  | 1.371     | 0.665, 2.827  | 0.398          |



Table 14. Mendelian randomization association of genetically predicted age at first birth with cardiovascular diseases.

| Cardiovascular disease  | Weighted median method |              |                 | MR-Egger regression method |              |                 |           |                 |
|-------------------------|------------------------|--------------|-----------------|----------------------------|--------------|-----------------|-----------|-----------------|
|                         | OR                     | 95% CI       | <i>p</i> -value | OR                         | 95% CI       | <i>p</i> -value | Intercept | <i>p</i> -value |
| Myocardial infarction   | 0.923                  | 0.868, 0.982 | 0.011           | 0.811                      | 0.642, 1.025 | 0.084           | 0.007     | 0.403           |
| Coronary artery disease | 0.933                  | 0.880, 0.990 | 0.021           | 0.749                      | 0.602, 0.931 | 0.011           | 0.013     | 0.092           |
| Heart failure           | 0.973                  | 0.924, 1.024 | 0.296           | 0.923                      | 0.773, 1.102 | 0.379           | 1.68E-04  | 0.978           |
| Atrial fibrillation     | 0.967                  | 0.926, 1.010 | 0.131           | 0.982                      | 0.835, 1.154 | 0.827           | -0.003    | 0.623           |
| Stroke                  | 0.967                  | 0.919, 1.017 | 0.190           | 1.007                      | 0.832, 1.220 | 0.941           | -0.003    | 0.674           |

Table 15. Heterogeneity test by using MR Egger method for each outcome.

| Exposure           | Outcomes                | Heterogeneity |      |                 |                    |
|--------------------|-------------------------|---------------|------|-----------------|--------------------|
|                    |                         | Q             | O_df | <i>p</i> -value | I <sup>2</sup> (%) |
| Age at first birth | Myocardial infarction   | 102.3         | 72   | 0.011           | 29.6               |
|                    | Coronary artery disease | 107.9         | 72   | 0.004           | 33.3               |
|                    | Heart failure           | 106.7         | 74   | 0.008           | 30.6               |
|                    | Atrial fibrillation     | 124.8         | 75   | 2.70E-04        | 39.9               |
|                    | Stroke                  | 101.7         | 73   | 0.015           | 28.2               |

Table 16. The genetic liability to age at first birth with cardiovascular risk factors.

| Exposure           | Outcomes             | SNP | IVW                  | <i>p</i> -value |
|--------------------|----------------------|-----|----------------------|-----------------|
|                    |                      |     | OR (95% CI)          |                 |
| Age at first birth | Smoking              | 74  | 0.900 (0.869, 0.933) | 8.42E-09        |
|                    | Alcohol intake       | 75  | 1.000 (0.987, 1.012) | 0.940           |
|                    | Body mass index      | 55  | 0.945 (0.921, 0.970) | 1.91E-05        |
|                    | Depression           | 72  | 0.925 (0.892, 0.958) | 1.67E-05        |
|                    | Education attainment | 66  | 1.086 (1.054, 1.118) | 5.14E-08        |

Table 17. Mediation effect of education attainment on age at first birth-CVDs association.

| Outcomes                  | Total Effect            | Mediation Effect        |                 | Mediated Proportion |
|---------------------------|-------------------------|-------------------------|-----------------|---------------------|
|                           | Effect Size (95%CI)     | Effect Size (95%CI)     | <i>p</i> -value | (%) (95% CI)        |
| <b>Age at first birth</b> |                         |                         |                 |                     |
| Myocardial infarction     | -0.111 (-0.160, -0.062) | -0.026 (-0.046, -0.007) | 0.008           | 23.9 (6.4, 41.4)    |
| Coronary artery disease   | -0.104 (-0.150, -0.058) | -0.027 (-0.045, -0.008) | 0.005           | 25.5 (7.8, 43.3)    |
| Heart failure             | -0.078 (-0.116, -0.040) | -0.020 (-0.034, -0.005) | 0.009           | 25.4 (6.4, 44.3)    |
| Atrial fibrillation       | -0.058 (-0.093, -0.022) | -0.006 (-0.020, 0.009)  | 0.444           | 9.7 (-15.1, 34.5)   |

Table 18. Associations of single nucleotide polymorphisms for age at first birth, in female only.

| SNP         | Chr | Position  | EA | NEA | EAF    | Beta    | SE     | p-value  | N      | F-statistic |
|-------------|-----|-----------|----|-----|--------|---------|--------|----------|--------|-------------|
| rs12407439  | 1   | 22347396  | A  | G   | 0.8311 | -0.0876 | 0.0151 | 6.86E-09 | 343903 | 33.7        |
| rs2906457   | 1   | 44338575  | A  | C   | 0.2638 | -0.0677 | 0.0112 | 1.43E-09 | 412834 | 36.5        |
| rs2069278   | 1   | 66635371  | T  | C   | 0.6798 | 0.0592  | 0.0105 | 1.87E-08 | 412834 | 31.8        |
| rs10559     | 1   | 153920564 | G  | A   | 0.3039 | 0.0892  | 0.0116 | 1.14E-14 | 357353 | 59.1        |
| rs7516843   | 1   | 210322929 | A  | G   | 0.6833 | -0.0623 | 0.0105 | 3.37E-09 | 416877 | 35.2        |
| rs11887646  | 2   | 5891511   | A  | G   | 0.7642 | -0.077  | 0.0121 | 2.14E-10 | 383785 | 40.5        |
| rs72779695  | 2   | 12797853  | T  | C   | 0.1198 | -0.087  | 0.0158 | 3.76E-08 | 406425 | 30.3        |
| rs1606974   | 2   | 51873599  | A  | G   | 0.1297 | 0.0828  | 0.0149 | 2.51E-08 | 416879 | 30.9        |
| rs359247    | 2   | 60477052  | A  | T   | 0.3676 | 0.0856  | 0.0111 | 1.14E-14 | 357353 | 59.5        |
| rs11893460  | 2   | 104158394 | C  | T   | 0.5235 | 0.0711  | 0.0103 | 5.33E-12 | 388041 | 47.6        |
| rs80153284  | 2   | 156465747 | A  | C   | 0.0231 | 0.2459  | 0.0439 | 2.17E-08 | 396518 | 31.4        |
| rs112282597 | 2   | 166250414 | A  | G   | 0.7538 | -0.0703 | 0.0122 | 8.37E-09 | 377120 | 33.2        |
| rs2116097   | 3   | 17912087  | G  | A   | 0.458  | -0.0631 | 0.0107 | 4.14E-09 | 357353 | 34.8        |
| rs62262084  | 3   | 47653822  | T  | C   | 0.2536 | -0.0715 | 0.0117 | 8.37E-10 | 406425 | 37.3        |
| rs3172494   | 3   | 48731487  | T  | G   | 0.114  | 0.1412  | 0.0164 | 8.01E-18 | 380898 | 74.1        |
| rs9838987   | 3   | 49916044  | A  | G   | 0.498  | 0.1268  | 0.0107 | 2.34E-32 | 364516 | 140.4       |
| rs114142815 | 3   | 51191466  | T  | C   | 0.0908 | 0.108   | 0.0196 | 3.74E-08 | 370636 | 30.4        |
| rs11915934  | 3   | 74883069  | A  | G   | 0.1811 | 0.0826  | 0.0133 | 4.75E-10 | 386191 | 38.6        |
| rs1452180   | 3   | 83504521  | C  | T   | 0.1875 | -0.0801 | 0.0132 | 1.42E-09 | 388041 | 36.8        |
| rs17314804  | 4   | 140946828 | T  | C   | 0.3565 | 0.0736  | 0.0103 | 7.79E-13 | 412095 | 51.1        |
| rs16902068  | 5   | 45255478  | T  | A   | 0.1662 | -0.091  | 0.014  | 7.57E-11 | 388041 | 42.2        |
| rs34137317  | 6   | 32092625  | T  | C   | 0.0251 | 0.2429  | 0.042  | 7.06E-09 | 357311 | 33.4        |
| rs9276427   | 6   | 32711857  | T  | C   | 0.5193 | 0.0606  | 0.0105 | 7.44E-09 | 377409 | 33.3        |
| rs9372625   | 6   | 98344031  | A  | G   | 0.3667 | -0.0701 | 0.0112 | 3.26E-10 | 357353 | 39.2        |
| rs6925118   | 6   | 143165488 | A  | G   | 0.8077 | -0.0714 | 0.0129 | 2.75E-08 | 406425 | 30.6        |
| rs12204714  | 6   | 152235339 | T  | C   | 0.6382 | -0.09   | 0.0108 | 7.00E-17 | 388041 | 69.4        |
| rs1464534   | 7   | 3505092   | C  | G   | 0.2944 | -0.0615 | 0.0108 | 1.15E-08 | 416877 | 32.4        |
| rs11249939  | 8   | 9556500   | A  | G   | 0.6134 | 0.063   | 0.0108 | 5.28E-09 | 375737 | 34.0        |
| rs35180283  | 8   | 91190780  | C  | T   | 0.2916 | 0.0682  | 0.0125 | 4.48E-08 | 339269 | 29.8        |
| rs7865801   | 9   | 14745886  | A  | G   | 0.6331 | 0.0651  | 0.0105 | 6.38E-10 | 404971 | 38.4        |
| rs10962552  | 9   | 16723742  | T  | C   | 0.1685 | -0.0753 | 0.0138 | 4.77E-08 | 407377 | 29.8        |
| rs1590949   | 9   | 23360417  | C  | G   | 0.5916 | -0.069  | 0.0103 | 2.15E-11 | 406425 | 44.9        |
| rs10786831  | 10  | 106614571 | G  | A   | 0.6018 | -0.073  | 0.011  | 2.85E-11 | 357353 | 44.0        |
| rs6585429   | 10  | 118893231 | A  | G   | 0.1854 | -0.0956 | 0.0134 | 9.03E-13 | 386245 | 50.9        |
| rs12361594  | 11  | 30327006  | A  | G   | 0.146  | -0.0902 | 0.0153 | 3.83E-09 | 357353 | 34.8        |
| rs1702877   | 12  | 56427808  | T  | C   | 0.3369 | 0.0628  | 0.0107 | 3.90E-09 | 406425 | 34.4        |
| rs10779030  | 12  | 84107863  | C  | A   | 0.3621 | 0.0837  | 0.0109 | 1.26E-14 | 388041 | 59.0        |
| rs9561311   | 13  | 93978321  | G  | A   | 0.1431 | 0.0925  | 0.0162 | 1.15E-08 | 339269 | 32.6        |
| rs6574018   | 14  | 72213258  | T  | G   | 0.3607 | 0.0601  | 0.0109 | 3.24E-08 | 375737 | 30.4        |
| rs2224234   | 14  | 103382038 | A  | C   | 0.7964 | 0.0876  | 0.0134 | 7.22E-11 | 352409 | 42.7        |

|            |    |           |   |   |        |         |        |          |        |      |
|------------|----|-----------|---|---|--------|---------|--------|----------|--------|------|
| rs8030494  | 15 | 74092777  | A | C | 0.6065 | 0.0575  | 0.0104 | 3.66E-08 | 387117 | 30.6 |
| rs10445366 | 17 | 43932797  | C | G | 0.1821 | -0.0888 | 0.0149 | 2.61E-09 | 334705 | 35.5 |
| rs7359501  | 17 | 56641200  | T | C | 0.4067 | 0.0625  | 0.0102 | 1.01E-09 | 406425 | 37.5 |
| rs60222682 | 18 | 36510587  | T | C | 0.2026 | -0.0724 | 0.0127 | 1.21E-08 | 406425 | 32.5 |
| rs590076   | 18 | 53260732  | A | G | 0.3494 | -0.0665 | 0.0103 | 1.06E-10 | 412096 | 41.7 |
| rs8110682  | 19 | 13285293  | T | C | 0.6326 | -0.0873 | 0.0119 | 2.59E-13 | 341109 | 53.8 |
| rs293566   | 20 | 31097877  | T | C | 0.6498 | 0.071   | 0.0108 | 4.42E-11 | 381406 | 43.2 |
| rs2253763  | 21 | 46642764  | T | C | 0.3998 | 0.0583  | 0.0107 | 4.75E-08 | 373601 | 29.7 |
| rs5932889  | 23 | 130436456 | C | G | 0.6522 | -0.087  | 0.013  | 2.21E-11 | 318063 | 44.8 |
| rs183103   | 23 | 131768905 | T | C | 0.6975 | 0.0954  | 0.0132 | 5.23E-13 | 318063 | 52.2 |
| rs11713522 | 3  | 45422308  | A | C | 0.3079 | 0.0646  | 0.0106 | 1.14E-09 | 416879 | 37.1 |

Chr, chromosome; EA, effect allele; EAF, effect allele frequency; NEA, non-effect allele.

Table 19. Mendelian randomization association of genetically predicted age at first birth with cardiovascular diseases, in female only.

| Exposure                            | Outcome                 | Method                    | OR    | 95% CI         | <i>p</i> -value |
|-------------------------------------|-------------------------|---------------------------|-------|----------------|-----------------|
| Age at first birth<br>(Female only) | Coronary artery disease | Inverse-variance weighted | 0.928 | (0.879, 0.980) | 0.007           |
|                                     |                         | Weighted median           | 0.970 | (0.908, 1.036) | 0.362           |
|                                     |                         | MR Egger                  | 0.727 | (0.566, 0.934) | 0.016           |
|                                     | Myocardial infarction   | Inverse-variance weighted | 0.928 | (0.876, 0.984) | 0.012           |
|                                     |                         | Weighted median           | 0.940 | (0.877, 1.008) | 0.082           |
|                                     |                         | MR Egger                  | 0.759 | (0.578, 0.996) | 0.053           |
|                                     | Heart failure           | Inverse-variance weighted | 0.932 | (0.892, 0.973) | 0.001           |
|                                     |                         | Weighted median           | 0.967 | (0.917, 1.020) | 0.223           |
|                                     |                         | MR Egger                  | 0.940 | (0.764, 1.156) | 0.561           |
|                                     | Atrial fibrillation     | Inverse-variance weighted | 0.943 | (0.906, 0.981) | 0.004           |
|                                     |                         | Weighted median           | 0.971 | (0.926, 1.017) | 0.056           |
|                                     |                         | MR Egger                  | 1.070 | (0.899, 1.275) | 0.216           |
|                                     | Stroke                  | Inverse-variance weighted | 0.981 | (0.941, 1.023) | 0.373           |
|                                     |                         | Weighted median           | 1.022 | (0.969, 1.077) | 0.425           |
|                                     |                         | MR Egger                  | 1.121 | (0.908, 1.384) | 0.293           |
